# Supplementary material
Source: publisher site journal article supplement (https://www.dovepress.com/get_supplementary_file.php?f=303497.docx)
Supplement: Supplementary file 1 [file get_supplementary_file.php]

Supplementary Table S1 Model building steps of linezolid population pharmacokinetic model in the critically ill patients.

| Models | No. of parameters | OFV | Difference in OFV  (vs Base Model) |
| --- | --- | --- | --- |
| Model 1: Two-compartment model with a zero-order input rate | 4 | 1126.5 | - |
| Model 2 (Base model): One-compartment model with a zero-order input rate | 2 | 1122.3 | - |
| Model 3: One-compartment model with a covariate WT on CL | 3 | 1114.6 | -7.8 |
| Model 4: One-compartment model with a covariate sCr on CL | 3 | 1115.1 | -7.3 |
| Model 5: One-compartment model with a covariate AGE on CL | 3 | 1119.6 | -2.8 |
| Model 6: One-compartment model with a covariate CRRT on CL | 3 | 1118.3 | -4.1 |
| Model 7: One-compartment model with a covariate SOFA scores on CL | 3 | 1116.6 | -5.7 |
| Model 8: One-compartment model with a covariate APACHE II scores on CL | 3 | 1120.8 | -1.5 |
| Model 9: One-compartment model with a covariate gender scores on CL | 3 | 1122.0 | -0.3 |
| Model 10: One-compartment model with a covariate WT on V | 3 | 1120.4 | -1.9 |
| Model 11: One-compartment model with a covariate CRRT on CL | 3 | 1123.5 | 1.2 |
| Model 12: One-compartment model with a covariate ALT on CL | 3 | 1118.2 | -4.1 |
| Model 13: One-compartment model with a covariate AST on CL | 3 | 1121.9 | -0.4 |
| Model 14: One-compartment model with a covariate TBIL on CL | 3 | 1120.3 | -2.0 |
| Model 15: One-compartment model with a covariate DBIL on CL | 3 | 1119.6 | -2.7 |
| Model 16 (Final model): One-compartment model with a covariate CrCL on CL | 3 | 1103.9 | -18.4  *P*<0.001 |
| Model 17: One-compartment model with a covariate CrCL on CL and WT on V | 4 | 1113.5 | -8.8 |
| Model 18: One-compartment model with a covariate WT on CL and WT on V | 4 | 1111.4 | -10.9 |

OFV, objective function value; WT, body weight; sCr, serum creatinine; CRRT, continuous renal replacement therapy; SOFA scores, baseline sequential organ failure assessment (SOFA) scores; APACHE) II scores, baseline acute physiology and chronic health evaluation (APACHE) II scores; ALT, alanine aminotransferase; AST, Aspartate aminotransferase; TBIL, total bilirubin; DBIL, direct Bilirubin; CrCL was calculated using the Cockcroft-Gault formula.

Supplementary Table S2 Probabilities of therapeutic target attainment (PTTA) and percentages of patients who failed to meet one of the success criteria (AUC24/MIC<80, %T>MIC <85% or *C*ss,min>10mg/L) based on minimum inhibitory concentrations (MICs) of 0.25 to 4 mg/L for all dosages in the patient groups and stratified by renal function.

| **Renal function** | **Daily dose (mg)** | **MIC(mg/L)**  **Dosage (mg)** | **PTTA (%)** | | | | | | **Percentages of the patients who failed to meet one of the success criteria** | | | | | | | | | | | | |
| --- | --- | --- | --- | --- | --- | --- | --- | --- | --- | --- | --- | --- | --- | --- | --- | --- | --- | --- | --- | --- | --- |
| **AUC24/MIC<80 (%)** | | | | | | **%T>MIC <85% (%)** | | | | | | ***C*ss,min>10mg/L**  **(%)** |
| **0.25** | **0.5** | **1** | **2** | **3** | **4** | **0.25** | **0.5** | **1** | **2** | **3** | **4** | **0.25** | **0.5** | **1** | **2** | **3** | **4** |
| Impaired (CrCL=40 mL/min) | 1200 | 400 q12h | 100 | 100 | 100 | 55 | 6 | 0 | 0 | 0 | 0 | 45 | 94 | 100 | 0 | 0 | 0 | 2 | 21 | 43 | 0 |
| 600 q12h | 96 | 96 | 96 | 96 | 52 | 16 | 0 | 0 | 0 | 0 | 44 | 80 | 0 | 0 | 0 | 0 | 2 | 14 | 4 |
| 400 q8h | 81 | 81 | 81 | 81 | 37 | 4 | 0 | 0 | 0 | 0 | 44 | 78 | 0 | 0 | 0 | 0 | 0 | 2 | 19 |
| 300 q6h | 74 | 74 | 74 | 74 | 30 | 0 | 0 | 0 | 0 | 0 | 44 | 80 | 0 | 0 | 0 | 0 | 0 | 0 | 26 |
| 1200 24h inf. | 44 | 44 | 44 | 44 | 0 | 0 | 0 | 0 | 0 | 0 | 44 | 78 | 0 | 0 | 0 | 0 | 0 | 0 | 56 |
| 1800 | 900 q12h | 68 | 68 | 68 | 68 | 68 | 38 | 0 | 0 | 0 | 0 | 0 | 31 | 0 | 0 | 0 | 0 | 0 | 1 | 32 |
| 600 q8h | 47 | 47 | 47 | 47 | 47 | 18 | 0 | 0 | 0 | 0 | 0 | 30 | 0 | 0 | 0 | 0 | 0 | 0 | 53 |
| 450 q6h | 34 | 34 | 34 | 34 | 34 | 6 | 0 | 0 | 0 | 0 | 0 | 28 | 0 | 0 | 0 | 0 | 0 | 0 | 66 |
| 1800 24h inf. | 0 | 0 | 0 | 0 | 0 | 0 | 0 | 0 | 0 | 0 | 0 | 29 | 0 | 0 | 0 | 0 | 0 | 0 | 100 |
| 2400 | 1200 q12h | 45 | 45 | 45 | 45 | 45 | 44 | 0 | 0 | 0 | 0 | 0 | 0 | 0 | 0 | 0 | 0 | 0 | 0 | 55 |
| 800 q8h | 24 | 24 | 24 | 24 | 24 | 24 | 0 | 0 | 0 | 0 | 0 | 0 | 0 | 0 | 0 | 0 | 0 | 0 | 76 |
| 600 q6h | 12 | 12 | 12 | 12 | 12 | 12 | 0 | 0 | 0 | 0 | 0 | 0 | 0 | 0 | 0 | 0 | 0 | 0 | 88 |
| 2400 24h inf. | 0 | 0 | 0 | 0 | 0 | 0 | 0 | 0 | 0 | 0 | 0 | 0 | 0 | 0 | 0 | 0 | 0 | 0 | 100 |
| Normal (CrCL=80 mL/min) | 1200 | 600 q12h | 100 | 100 | 100 | 74 | 23 | 0 | 0 | 0 | 0 | 26 | 77 | 100 | 0 | 0 | 0 | 6 | 25 | 45 | 0 |
| 400 q8h | 100 | 100 | 100 | 72 | 23 | 0 | 0 | 0 | 0 | 28 | 77 | 100 | 0 | 0 | 0 | 0 | 8 | 27 | 0 |
| 300 q6h | 100 | 100 | 100 | 73 | 23 | 0 | 0 | 0 | 0 | 27 | 77 | 100 | 0 | 0 | 0 | 0 | 0 | 11 | 0 |
| 1200 24h inf. | 77 | 77 | 77 | 49 | 0 | 0 | 0 | 0 | 0 | 28 | 77 | 100 | 0 | 0 | 0 | 0 | 0 | 0 | 23 |
| 1800 | 900 q12h | 96 | 96 | 96 | 95 | 68 | 32 | 0 | 0 | 0 | 0 | 28 | 64 | 0 | 0 | 0 | 1 | 7 | 20 | 4 |
| 600 q8h | 80 | 80 | 80 | 80 | 52 | 17 | 0 | 0 | 0 | 0 | 27 | 62 | 0 | 0 | 0 | 0 | 0 | 3 | 20 |
| 450 q6h | 69 | 69 | 69 | 69 | 41 | 6 | 0 | 0 | 0 | 0 | 28 | 64 | 0 | 0 | 0 | 0 | 0 | 0 | 31 |
| 1800 24h inf. | 26 | 26 | 26 | 26 | 0 | 0 | 0 | 0 | 0 | 0 | 26 | 62 | 0 | 0 | 0 | 0 | 0 | 0 | 74 |
| 2400 | 1200 q12h | 79 | 79 | 79 | 79 | 78 | 52 | 0 | 0 | 0 | 0 | 0 | 27 | 0 | 0 | 0 | 0 | 1 | 6 | 21 |
| 800 q8h | 56 | 56 | 56 | 56 | 56 | 29 | 0 | 0 | 0 | 0 | 0 | 27 | 0 | 0 | 0 | 0 | 0 | 0 | 44 |
| 600 q6h | 45 | 45 | 45 | 45 | 45 | 17 | 0 | 0 | 0 | 0 | 0 | 28 | 0 | 0 | 0 | 0 | 0 | 0 | 55 |
| 2400 24h inf. | 0 | 0 | 0 | 0 | 0 | 0 | 0 | 0 | 0 | 0 | 0 | 27 | 0 | 0 | 0 | 0 | 0 | 0 | 100 |
| ARC (threefold normal CL of LNZ) | 1200 | 600 q12h | 47 | 25 | 5 | 0 | 0 | 0 | 0 | 0 | 78 | 100 | 100 | 100 | 53 | 75 | 95 | 100 | 100 | 100 | 0 |
| 400 q8h | 81 | 57 | 21 | 0 | 0 | 0 | 0 | 0 | 75 | 100 | 100 | 100 | 19 | 43 | 72 | 99 | 100 | 100 | 0 |
| 300 q6h | 99 | 87 | 21 | 0 | 0 | 0 | 0 | 0 | 79 | 100 | 100 | 100 | 1 | 13 | 47 | 90 | 100 | 100 | 0 |
| 1200 24h inf. | 100 | 100 | 22 | 0 | 0 | 0 | 0 | 0 | 78 | 100 | 100 | 100 | 0 | 0 | 0 | 15 | 63 | 97 | 0 |
| 1800 | 900 q12h | 58 | 38 | 15 | 0 | 0 | 0 | 0 | 0 | 28 | 100 | 100 | 100 | 42 | 62 | 85 | 99 | 100 | 100 | 0 |
| 600 q8h | 90 | 72 | 43 | 0 | 0 | 0 | 0 | 0 | 27 | 100 | 100 | 100 | 10 | 28 | 57 | 89 | 99 | 100 | 0 |
| 450 q6h | 100 | 97 | 70 | 0 | 0 | 0 | 0 | 0 | 26 | 100 | 100 | 100 | 0 | 3 | 23 | 63 | 89 | 100 | 0 |
| 1800 24h inf. | 100 | 100 | 74 | 0 | 0 | 0 | 0 | 0 | 26 | 100 | 100 | 100 | 0 | 0 | 0 | 0 | 14 | 48 | 0 |
| 2400 | 1200 q12h | 68 | 48 | 26 | 5 | 0 | 0 | 0 | 0 | 0 | 77 | 100 | 100 | 32 | 52 | 74 | 95 | 100 | 100 | 0 |
| 800 q8h | 94 | 80 | 55 | 20 | 0 | 0 | 0 | 0 | 0 | 77 | 100 | 100 | 6 | 20 | 45 | 75 | 94 | 100 | 0 |
| 600 q6h | 100 | 99 | 86 | 22 | 0 | 0 | 0 | 0 | 0 | 78 | 100 | 100 | 0 | 1 | 14 | 47 | 71 | 88 | 0 |
| 2400 24h inf. | 100 | 100 | 100 | 22 | 0 | 0 | 0 | 0 | 0 | 78 | 100 | 100 | 0 | 0 | 0 | 0 | 0 | 15 | 0 |

AUC24/MIC: the area under curve from 0 to 24h at steady-state divided by the minimum inhibitory concentration (MIC); *C*ss,min: the steady-state trough concentration, it also refers to *C*ssfor 24-h continuous infusion. ARC: augmented renal function. Inf.: continuous infusion.


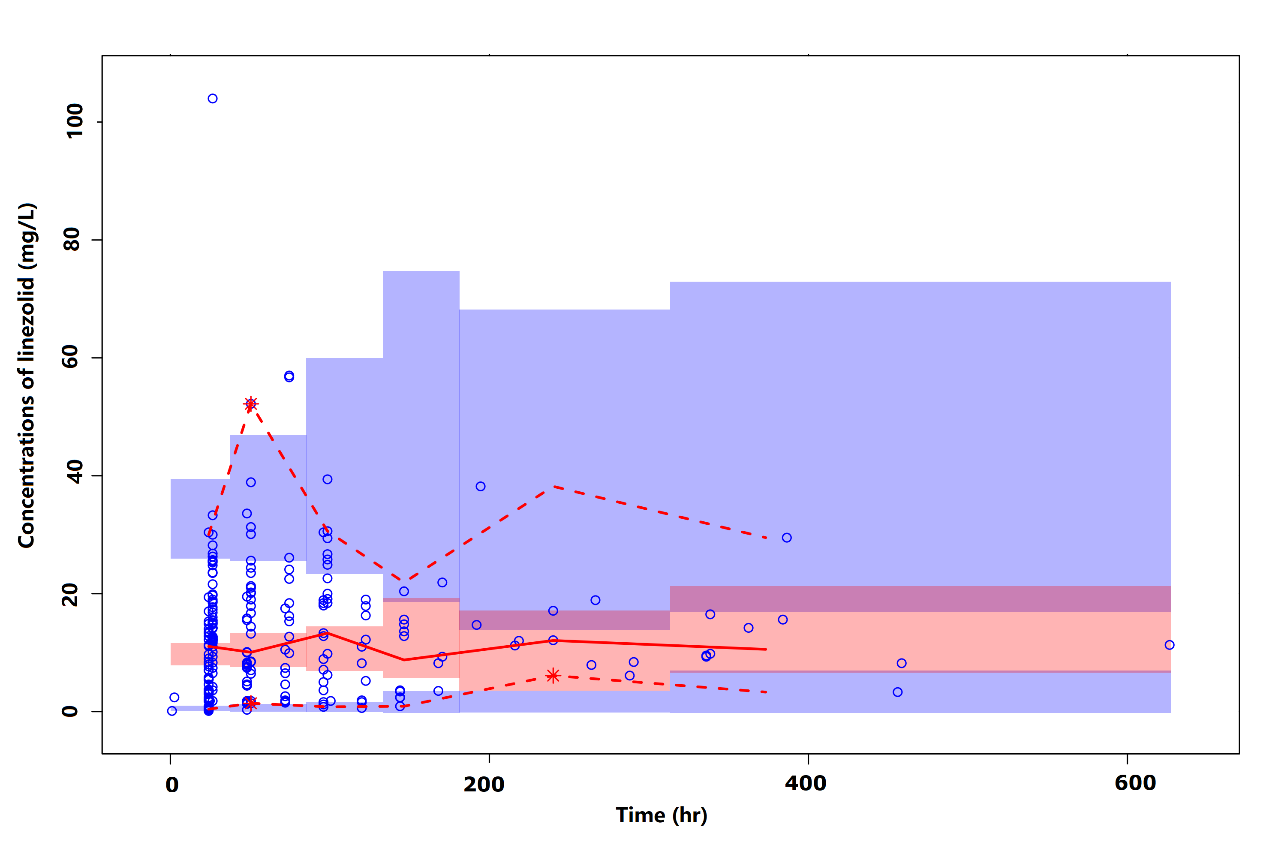


Figure S1. Visual predictive check (VPC) from the final population PK model.

**Notes:** solid red line lines represented the 50th percentile of observed data, dashed red lines represented the 5th and 95th percentiles of observed data. Red or blue shaded areas represent the 90% prediction interval.
